# Supplementary material for: Effect of Co, Cu, and Zn on FeAlK catalysts in CO2 hydrogenation to C5+ hydrocarbons
Source: Royal Society of Chemistry journal article supplement (doi:10.1039/d1cy01980e), 2021-12-20
Supplement: d1cy01980e1.pdf [file d1cy01980e1.pdf]

## Supporting Information

### Effect of Co, Cu, and Zn on FeAlK catalyst in CO<sub>2</sub>

### hydrogenation to C<sub>5+</sub> hydrocarbons

Khasan Nasriddinov<sup>1,2</sup>, Ji-Eun Min<sup>2</sup>, Hae-Gu Park<sup>2</sup>, Seung Ju Han<sup>2</sup>, Jingyu Chen<sup>1,2</sup>, Ki-Won Jun<sup>1,2\*</sup>, Seok Ki Kim<sup>1,2\*</sup>

<sup>1</sup> *Advanced Materials and Chemical Engineering, School of Science, Korea University of Science and Technology (UST), Yuseong, Daejeon, 305-333, Republic of Korea*

<sup>2</sup> *C1 Gas Conversion Research Group, Carbon Resources Institute, Korea Research Institute of Chemical Technology (KRICT), Yuseong, Daejeon, 34114, Republic of Korea*

\*Corresponding Author

Email: kwjun@kRICT.re.kr (KWJ); skkim726@kRICT.re.kr (SKK)

# Contents

|                                                                                                                                                                                                                                                                                       |   |
|---------------------------------------------------------------------------------------------------------------------------------------------------------------------------------------------------------------------------------------------------------------------------------------|---|
| <b>Figure S1.</b> Fresh catalysts XRD analysis. Each symbols stands for ▲ Fe <sub>2</sub> O <sub>3</sub> (JCPDS 84-0310); ■ Fe <sub>3</sub> O <sub>4</sub> (JCPDS 75-0449).....                                                                                                       | 3 |
| <b>Figure S2.</b> Spent catalysts XRD analysis. Each symbols stands for ▲ Fe <sub>2</sub> O <sub>3</sub> (JCPDS 25-1202); ◆ Fe <sub>3</sub> O <sub>4</sub> (JCPDS 75-0449); ◇ Fe <sub>5</sub> C <sub>2</sub> (JCPDS 20-0509); □ Fe <sub>3</sub> C <sub>1</sub> (JCPDS 06-0688). ..... | 3 |
| <b>Figure S3.</b> The relationship between CO <sub>2</sub> desorption and BET Surface area.....                                                                                                                                                                                       | 4 |
| <b>Figure S4.</b> Fe 2p XPS of fresh catalysts. Fresh FeAlK, xCo-FeAlK, xCu-FeAlK and, xZn-FeAlK catalysts High Resolution XPS profiles. ....                                                                                                                                         | 5 |
| <b>Figure S5.</b> Fe 2p XPS of spent catalysts. Fresh FeAlK, xCo-FeAlK, xCu-FeAlK and, xZn-FeAlK catalysts High Resolution XPS profiles. ....                                                                                                                                         | 6 |
| <b>Figure S6.</b> Survey XPS spectra of spent catalysts.....                                                                                                                                                                                                                          | 7 |
| <b>Figure S7.</b> Spent xCo-FeAlK, xCu-FeAlK and, xZn-FeAlK catalysts Survey XPS profiles. ....                                                                                                                                                                                       | 7 |
| <b>Figure S8.</b> CO <sub>2</sub> conversion and products yield during 100 h of reaction.....                                                                                                                                                                                         | 8 |

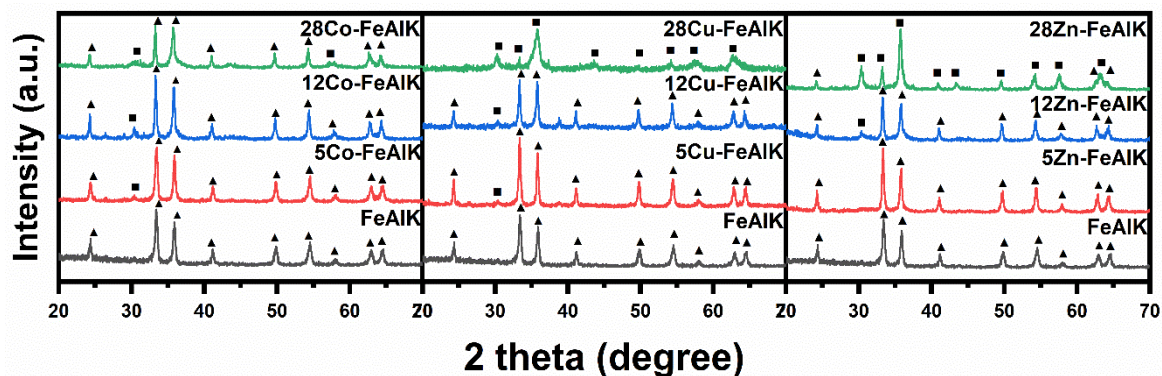

**Figure S1.** Fresh catalysts XRD analysis. Each symbols stands for ▲  $\text{Fe}_2\text{O}_3$  (JCPDS 84-0310); ■  $\text{Fe}_3\text{O}_4$  (JCPDS 75-0449).

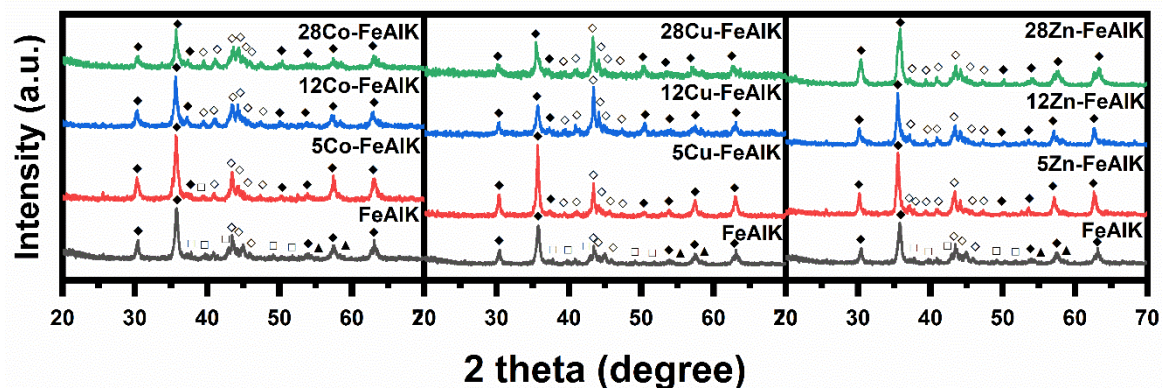

**Figure S2.** Spent catalysts XRD analysis. Each symbols stands for ▲  $\text{Fe}_2\text{O}_3$  (JCPDS 25-1202); ◆  $\text{Fe}_3\text{O}_4$  (JCPDS 75-0449); ◇  $\text{Fe}_5\text{C}_2$  (JCPDS 20-0509); □  $\text{Fe}_3\text{C}_1$  (JCPDS 06-0688).

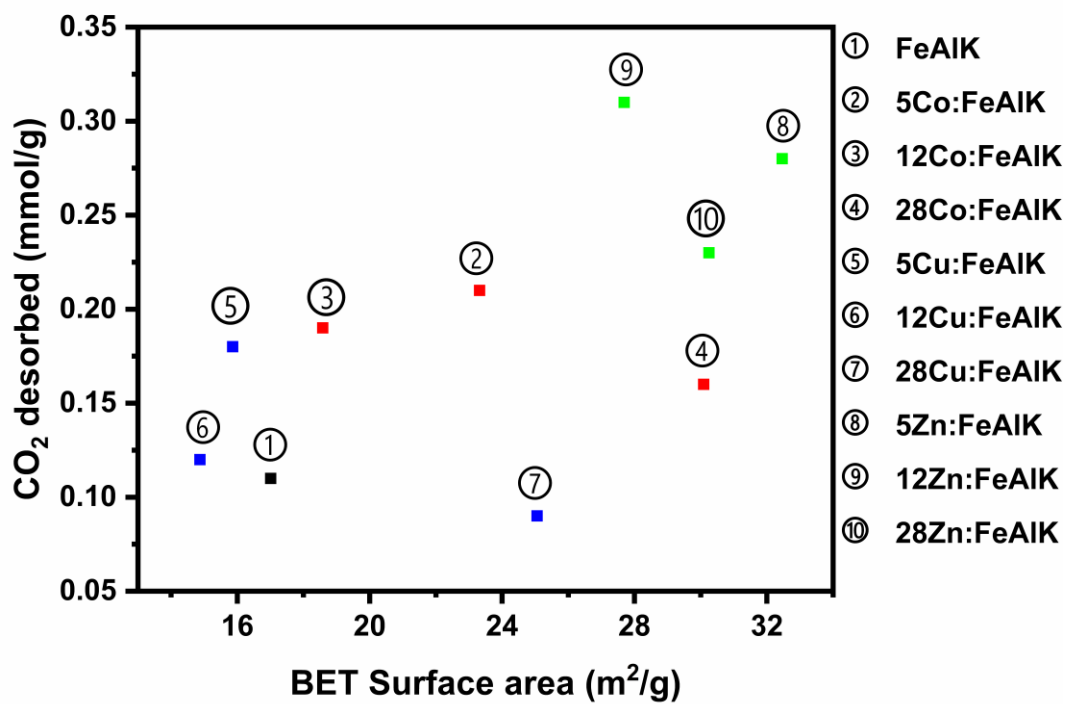

Figure S3. The relationship between CO<sub>2</sub> desorption and BET Surface area.

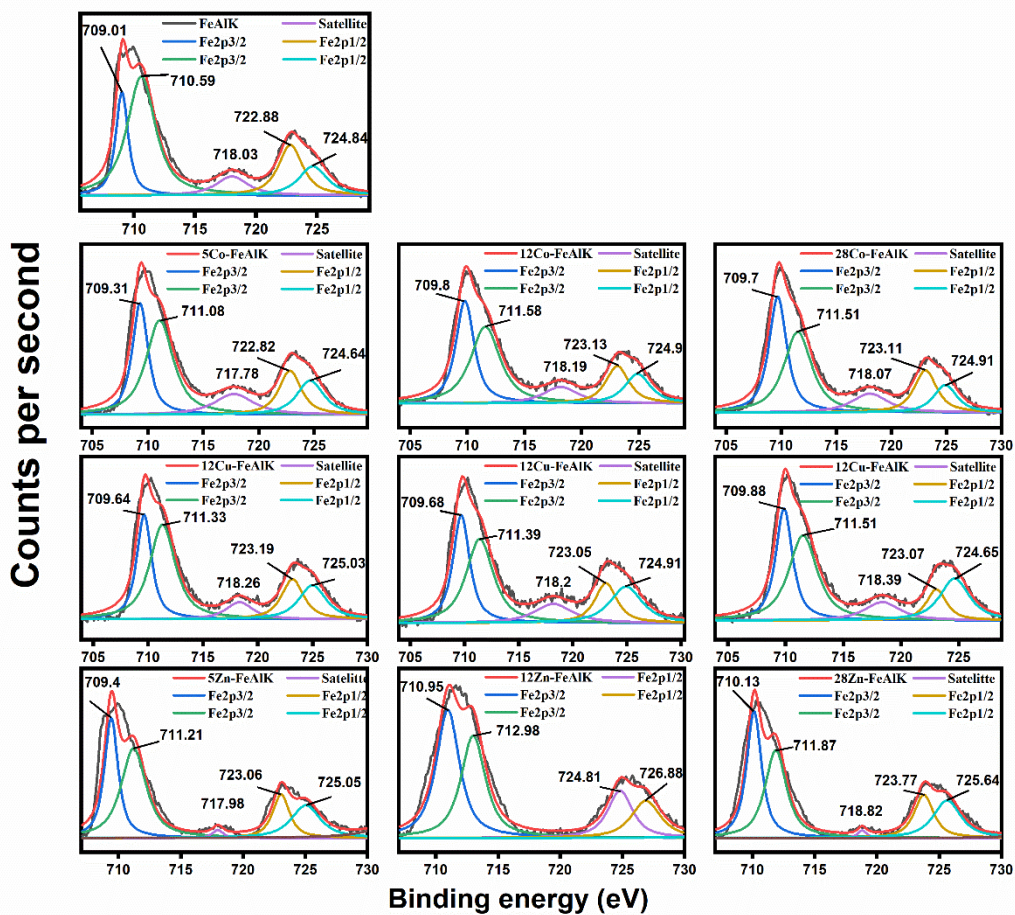

**Figure S4.** Fe 2p XPS of fresh catalysts. Fresh FeAlK, xCo-FeAlK, xCu-FeAlK and, xZn-FeAlK catalysts High Resolution XPS profiles.

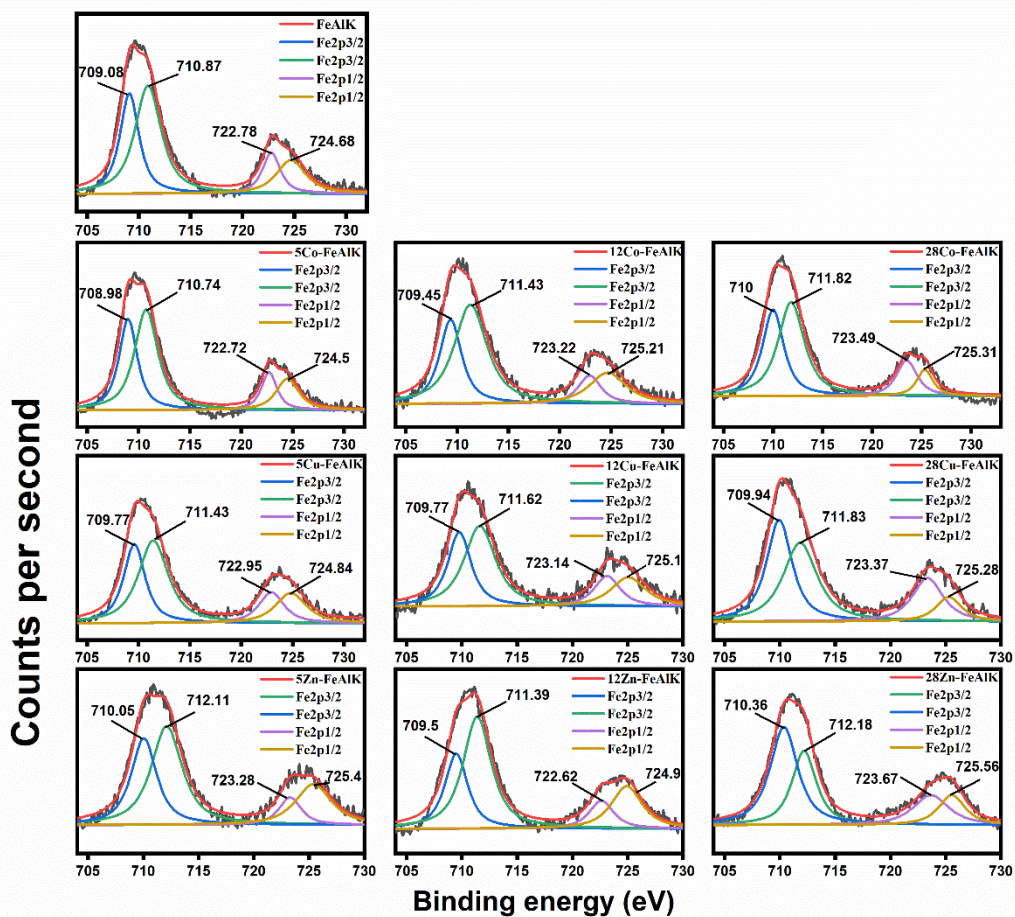

Figure S5. Fe 2p XPS of spent catalysts. Fresh FeAlK, xCo-FeAlK, xCu-FeAlK and, xZn-FeAlK catalysts High Resolution XPS profiles.



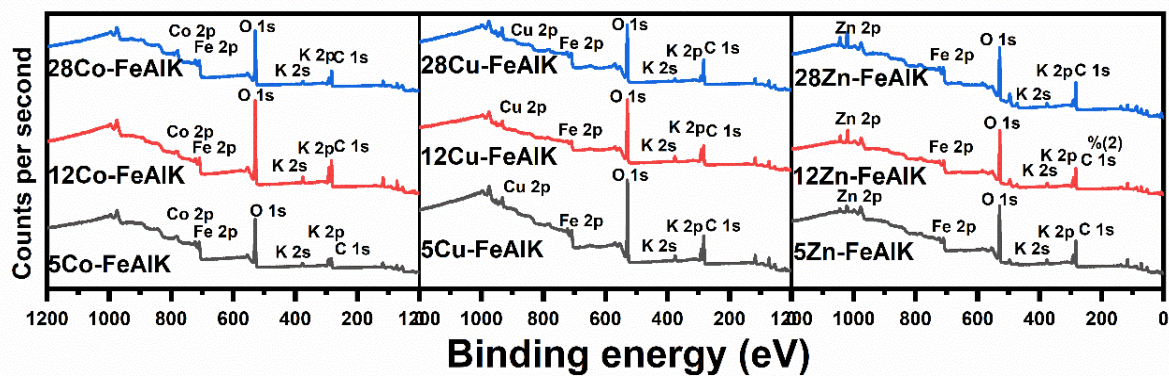

Figure S6. Survey XPS spectra of spent catalysts.

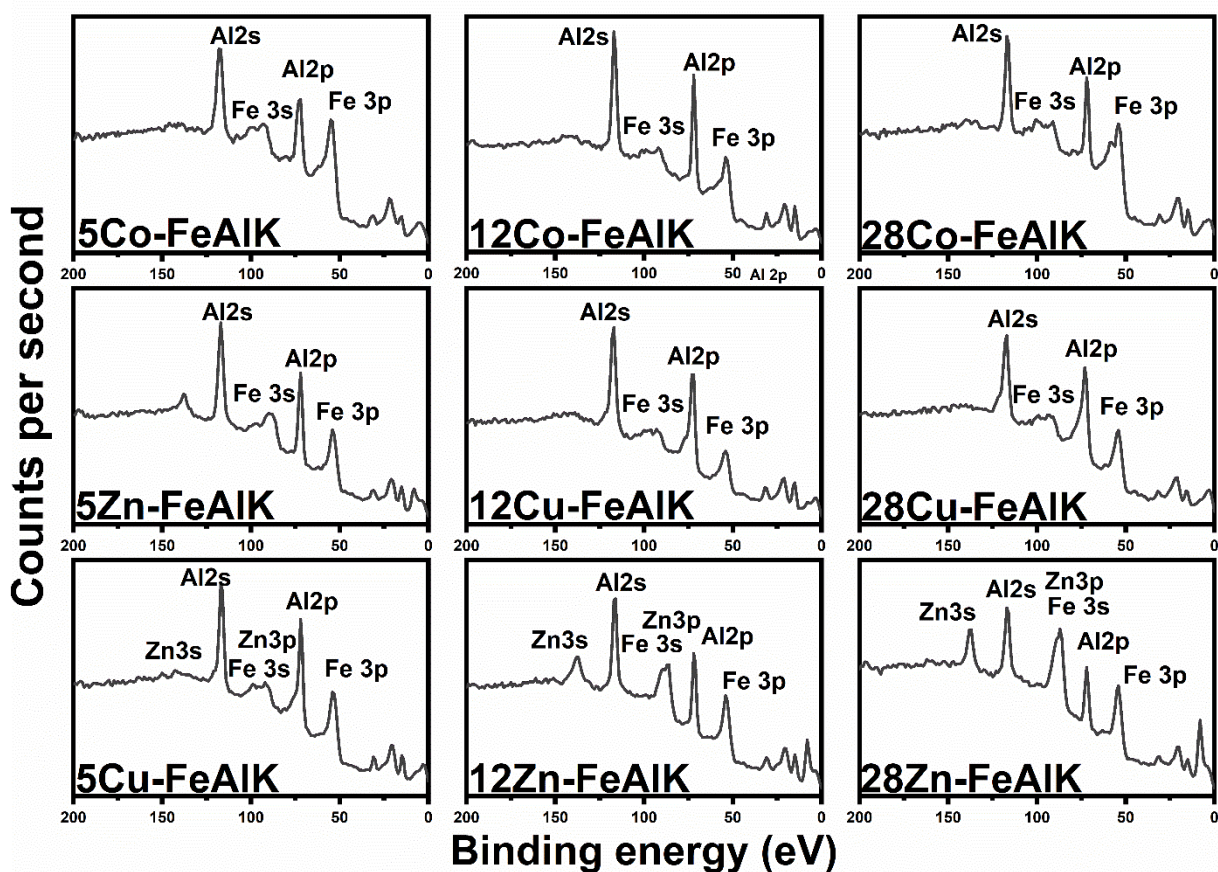

Figure S7. Spent xCo-FeAlK, xCu-FeAlK and, xZn-FeAlK catalysts Survey XPS profiles.

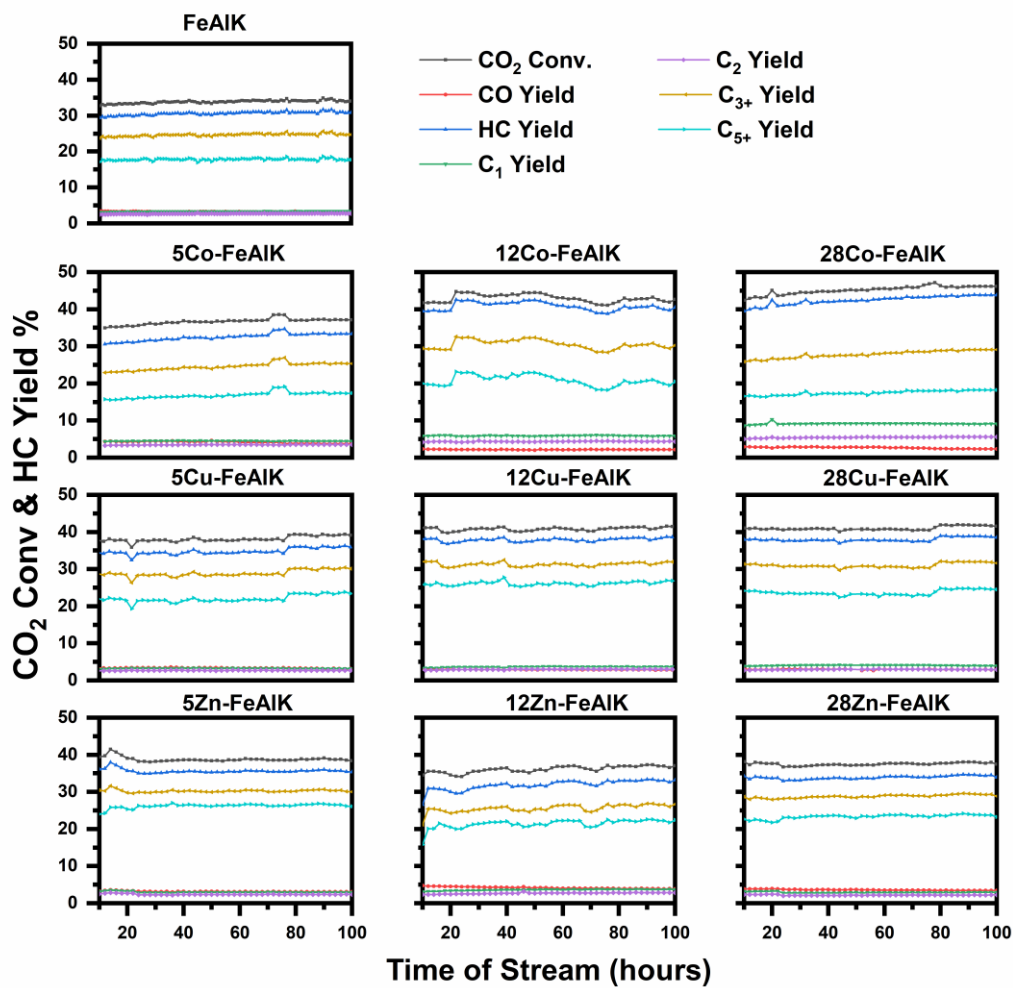

**Figure S8.** CO<sub>2</sub> conversion and products yield during 100 h of reaction.
